# Supplementary material for: Tropical tropopause ozone modulated by tropopause height
Source: Copernicus journal article supplement (doi:10.5194/acp-26-2691-2026), 2026-02-20
Supplement: Supplementary file [file acp-26-2691-2026-supplement-title-page.pdf › acp-26-2691-2026-supplement-title-page.pdf]

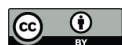

*Supplement of*

## **Tropical tropopause ozone modulated by tropopause height**

**Stephen Bourguet**

*Correspondence to:* Stephen Bourguet ([sjbourguet@gmail.com](mailto:sjbourguet@gmail.com))

- [acp-26-2691-2026-supplement-title-page.pdf](#)
- [FigS1.png](#)
- [FigS2.png](#)
- [FigS3.png](#)

The copyright of individual parts of the supplement might differ from the article licence.
